# Supplementary material for: In vitro induction and in vivo engraftment of kidney organoids derived from human pluripotent stem cells
Source: PubMed Central journal article supplement — Exp Ther Med. 2020 Jun 5;20(2):1307–14. doi: 10.3892/etm.2020.8844 (PMC7388233; doi:10.3892/etm.2020.8844), 2020-06-05

Figure S1. Effect of unilateral nephrectomy on engraftment of kidney organoids below the kidney capsules. Kidney organoids (cultured in 96-well, round bottom, ultra-low attachment plates in the 3-D culture stage; the induction method for the first 7 days was the same as the original one) derived from human pluripotent stem cells were transplanted into the kidney capsule of mice. Experimental group: Unilateral nephrectomy performed on mice. Control group: Unilateral nephrectomy was not performed on mice. There were six mice in each group. (A) A total of 2 weeks later after transplantation, the kidney organoids were removed and imaged. (B) Statistical results showed that the volume of kidney organoids in the experimental group was  $23.89 \pm 6.39 \text{ mm}^3$  and the volume of kidney organoids in the control group was  $8.94 \pm 2.25 \text{ mm}^3$ . There was a significant difference between the two groups. Data are presented as the mean  $\pm$  SD. P-values were calculated using an independent t-test.  $**P < 0.01$ .

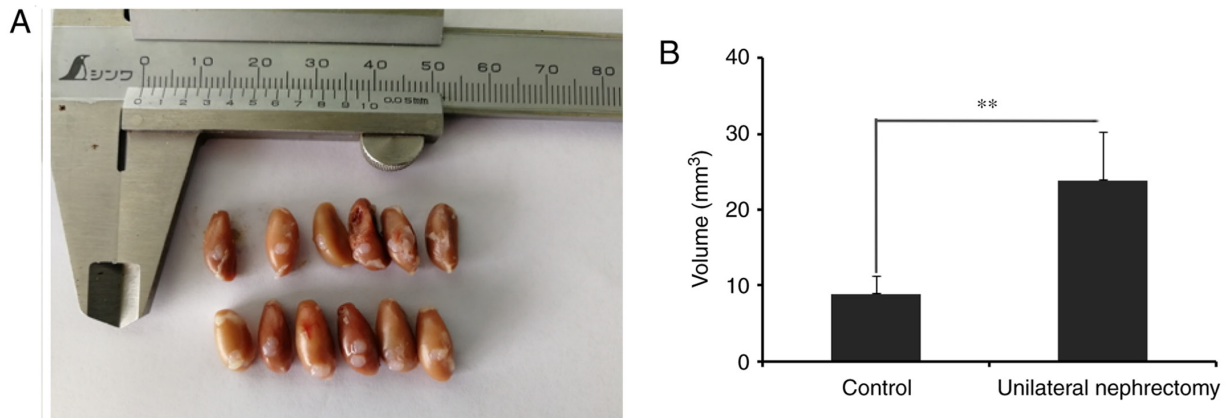

Supplement: Supplementary_Data.pdf [file Supplementary_Data.pdf]
